## RETRACTION

An analytical propofol assay inaccuracy was discovered after initial studies on the pharmacokinetics/pharmacodynamics and tolerability of fospropofol had been published. This assay inaccuracy makes the measured propofol plasma concentrations in the following previously published studies unreliable, and therefore these articles are retracted in their entirety:

### **Fospropofol Assay Issues and Impact on Pharmacokinetic and Pharmacodynamic Evaluation: Retraction**

#### **Reference**

Shah A, Mistry B, Gibiansky E, Gibiansky L: Fospropofol assay issues and impact on pharmacokinetic and pharmacodynamic evaluation (letter). *ANESTHESIOLOGY* 2008; 109:937; reply

### **Pharmacokinetics and Clinical Pharmacodynamics of the New Propofol Prodrug GPI 15715 in Volunteers: Retraction**

#### **Reference**

Fechner J, Ihmsen H, Hatterscheid D, Schiessl C, Vornov JJ, Burak E, Schwilden H, Schüttler J: Pharmacokinetics and clinical pharmacodynamics of the new propofol prodrug GPI 15715 in volunteers. *ANESTHESIOLOGY* 2003; 99:303–13

### **Comparative Pharmacokinetics and Pharmacodynamics of the New Propofol Prodrug GPI 15715 and Propofol Emulsion: Retraction**

#### **Reference**

Fechner J, Ihmsen H, Hatterscheid D, Jeleazcov C, Schiessl C, Vornov JJ, Schwilden H, Schüttler J: Comparative pharmacokinetics and pharmacodynamics of the new propofol prodrug GPI 15715 and propofol emulsion. *ANESTHESIOLOGY* 2004; 101: 626–39

### **AQUAVAN Injection, a Water-soluble Prodrug of Propofol, as a Bolus Injection: A Phase I Dose-escalation Comparison with DIPRIVAN (Part 1): Pharmacokinetics: Retraction**

#### **Reference**

Gibiansky E, Struys MM, Gibiansky L, Vanluchene AL, Vornov J, Mortier EP, Burak E, Van Bortel L: AQUAVAN injection, a water-soluble prodrug of propofol, as a bolus injection: A phase I dose-escalation comparison with DIPRIVAN (part 1): Pharmacokinetics. *ANESTHESIOLOGY* 2005; 103:718–29

### **AQUAVAN Injection, a Water-soluble Prodrug of Propofol, as a Bolus Injection: A Phase I Dose-escalation Comparison with DIPRIVAN (Part 2): Pharmacodynamics and Safety: Retraction**

#### **Reference**

Struys MM, Vanluchene AL, Gibiansky E, Gibiansky L, Vornov J, Mortier EP, Van Bortel L: AQUAVAN injection, a water-soluble prodrug of propofol, as a bolus injection: A phase I dose-escalation comparison with DIPRIVAN (part 2): Pharmacodynamics and safety. *ANESTHESIOLOGY* 2005; 103:730–43
